# Supplementary material
Source: PubMed Central journal article supplement (PMC3504766)
Supplement: supp_M112.404541_jbc.M112.404541-2.pdf [file supp_M112.404541_jbc.M112.404541-2.pdf]

## **Supplemental Information**

### **Dual specificity phosphatase 4 mediates cardiomyopathy caused by *LMNA* gene mutation**

Jason C. Choi<sup>1,2</sup>, Wei Wu<sup>1,2</sup>, Antoine Muchir<sup>1,2</sup>, Shinichi Iwata<sup>1</sup>, Shunichi Homma<sup>1</sup>, Howard J.  
Worman<sup>1,2\*</sup>

<sup>1</sup>Department of Medicine, <sup>2</sup>Department of Pathology and Cell Biology, College of Physicians and  
Surgeons, Columbia University, New York, New York 10032, USA

#### Contents:

- Supplemental Table 1 - 3

### **Glucose metabolic process**

|                |                                                          |
|----------------|----------------------------------------------------------|
| <i>Atf4</i>    | Activating transcription factor 4                        |
| <i>Pygb</i>    | Brain glycogen phosphorylase                             |
| <i>Cpt1a</i>   | Carnitine palmitoyltransferase 1a, liver                 |
| <i>Gck</i>     | Glucokinase                                              |
| <i>G6pdx</i>   | Glucose-6-phosphate dehydrogenase, X-linked              |
| <i>Pfkm</i>    | Phosphofructokinase, muscle                              |
| <i>Pgm5</i>    | Phosphoglucomutase 5                                     |
| <i>Gapdh</i>   | Glyceraldehyde-3-phosphate dehydrogenase                 |
| <i>Pdhb</i>    | Pyruvate dehydrogenase beta                              |
| <i>Ppp1r3a</i> | Protein phosphatase 1, regulatory (inhibitor) subunit 3A |
| <i>Ppp1r3b</i> | Protein phosphatase 1, regulatory (inhibitor) subunit 3B |
| <i>Pdk2</i>    | Pyruvate dehydrogenase kinase, isoenzyme 2               |

## **Mitochondrion**

|                |                                                                   |
|----------------|-------------------------------------------------------------------|
| <i>Decr1</i>   | 2,4-dienoyl CoA reductase 1, mitochondrial                        |
| <i>Hmgcs2</i>  | 3-hydroxy-3-methylglutaryl-Coenzyme A synthase 2                  |
| <i>Akap1</i>   | A kinase (PRKA) anchor protein 1                                  |
| <i>Gramd4</i>  | GRAM domain containing 4                                          |
| <i>Sh3bp5</i>  | SH3-domain binding protein 5 (BTK-associated)                     |
| <i>Acs11</i>   | Acyl-CoA synthetase long-chain family member 1                    |
| <i>Acadl</i>   | Acyl-Coenzyme A dehydrogenase, long-chain                         |
| <i>Acadvl</i>  | Acyl-Coenzyme A dehydrogenase, very long chain                    |
| <i>Adhfe1</i>  | Alcohol dehydrogenase, iron containing, 1                         |
| <i>Aldh6a1</i> | Aldehyde dehydrogenase family 6, subfamily A1                     |
| <i>Alas1</i>   | Aminolevulinic acid synthase 1                                    |
| <i>Clpx</i>    | Caseinolytic peptidase X (E.coli)                                 |
| <i>Cpox</i>    | Coproporphyrinogen oxidase                                        |
| <i>Dld</i>     | Dihydrolipoamide dehydrogenase                                    |
| <i>Etfdh</i>   | Electron transferring flavoprotein, dehydrogenase                 |
| <i>Ech1</i>    | Enoyl coenzyme A hydratase 1, peroxisomal                         |
| <i>Hadha</i>   | Enoyl-Coenzyme A hydratase (trifunctional protein), alpha subunit |
| <i>Mrpl35</i>  | Mitochondrial ribosomal protein L35                               |
| <i>Mfn1</i>    | Mitofusin 1                                                       |
| <i>Nnt</i>     | Nicotinamide nucleotide transhydrogenase                          |
| <i>Ptcd3</i>   | Pentatricopeptide repeat domain 3                                 |
| <i>Hadhb</i>   | Enoyl-Coenzyme A hydratase (trifunctional protein), beta subunit  |
| <i>Pdk4</i>    | Pyruvate dehydrogenase kinase, isoenzyme 4                        |
| <i>Afg3l2</i>  | Similar to AFG3(ATPase family gene 3)-like 2 (yeast)              |
| <i>Uqcrc2</i>  | Ubiquinol cytochrome c reductase core protein 2                   |

**Supplemental Table S2.** Downregulated gene list clustered under GO term “Mitochondrion”

|                                          | <u>Forward primer</u>     | <u>Reverse primer</u>     |
|------------------------------------------|---------------------------|---------------------------|
| <i>Dusp1</i>                             | 5' - GGCCTTTGAGTTTGTGAAGC | 5' - GGTGATGGGGCTTTTAAGGT |
| <i>Dusp2</i>                             | 5' - GGCCGAAAATAGCAACTCTG | 5' - CTCCTGGAACCAGGCACTTA |
| <i>Dusp3</i>                             | 5' - TGCAAGATCTCAACGACCTG | 5' - GAAATCTGTGGCCCTTTCAA |
| <i>Dusp4</i>                             | 5' - CTGTACCTCCCAGCACCAAT | 5' - GACGGGGATGCACTTGTACT |
| <i>Dusp5</i>                             | 5' - TGCACCACCCACCTACACTA | 5' - CTGTCCCATGAAGCCAAAGT |
| <i>Dusp6</i>                             | 5' - TTGAATGTCACCCCAATTT  | 5' - CATCGTTCATGGACAGGTTG |
| <i>Dusp7</i>                             | 5' - TGCCAAGGACTCTACCAACC | 5' - CTAGGCAGTGCACCAAGACA |
| <i>Dusp8</i>                             | 5' - CATCTGTGAGAGCCGTTTCA | 5' - CCGATCCTTCACAAACCTGT |
| <i>Dusp9</i>                             | 5' - ACCTTGAGCTGTGGCCTAGA | 5' - GGGGATCTGCTTGTAGTGGA |
| <i>Dusp10</i>                            | 5' - CATCGGCTATGTCATCAACG | 5' - ATTGGTCGTTTGCCTTTGAC |
| <i>Dusp11</i>                            | 5' - AGGACAGATGGCCTTGAAGA | 5' - CCTCGCACTCCAGAAGAATC |
| <i>Dusp12</i>                            | 5' - CGATACGTCCAGTGCCTTTT | 5' - CTATTGGCCCACTTCCTTCA |
| <i>Art4</i>                              | 5' - AGCTGCTGAGGAAAGACAGC | 5' - GGGGGATCAAGACTTCCTTC |
| <i>Cd36</i>                              | 5' - TGCTGGAGCTGTTATTGGTG | 5' - TGGGTTTTGCACATCAAAGA |
| <i>Egr1</i>                              | 5' - CCACAACAACAGGGAGACCT | 5' - ACTGAGTGGCGAAGGCTTTA |
| <i>Gapdh</i>                             | 5' - TGCACCACCAACTGCTTAG  | 5' - GGATGCAGGGATGATGTTC  |
| <i>Lonrf1</i>                            | 5' - AGTGCTTAGCCCTCGATGAA | 5' - CTCCTTTGACAGGCTCTGG  |
| <i>Ppp1r3b</i>                           | 5' - GCCCTGACAATGGTGAAAGT | 5' - ACAAAGCTCTCGCTCTCTGC |
| <i>Slc41a3</i>                           | 5' - TTCTGTGTCAGCACGAGTCC | 5' - CACTTCTGCCAGGTACAGCA |
| <i>Dusp4</i> Tg<br>genotyping<br>primers | 5' - CCCACACCAGAAATGACAGA | 5' - AGGATCTGCTCCAGGCTCAC |
| <i>Dusp4</i> Tg<br>genotyping<br>primers | 5' - TCTATTCGGGAACCAAGCTG | 5' - CTGTGTCTGGACGTCCTCCT |

**Supplemental Table S3.** Primers used for PCR analysis
